# Supplementary material for: Research on the Limit Values of Reclamation Based on Ecological Security: A Case Study of Tongzhou Bay in Rudong, Jiangsu Province
Source: MDPI journal article supplement (doi:10.3390/ijerph19148301), 2022-07-07
Supplement: s1 [file s1]

# Research on the limit values of reclamation based on ecological security: A case study of Tongzhou Bay in Rudong, Jiangsu Province

Haifeng Zhang<sup>1,2</sup>, Lin Zhao<sup>1</sup>, Wen Du<sup>1</sup>, Qing Liu<sup>1\*</sup>, Yifei Zhao<sup>1</sup> and Min Xu<sup>1\*</sup>  
(1. School of Marine Science and Engineering, Nanjing Normal University, Nanjing, 210046, China; 2. Island Research Center, MNR, P.R.C, Fujian, 350400, China)

\* Correspondence:

Qing Liu, Min Xu

E-mail: liuq@njnu.edu.cn; xumin0895@njnu.edu.cn

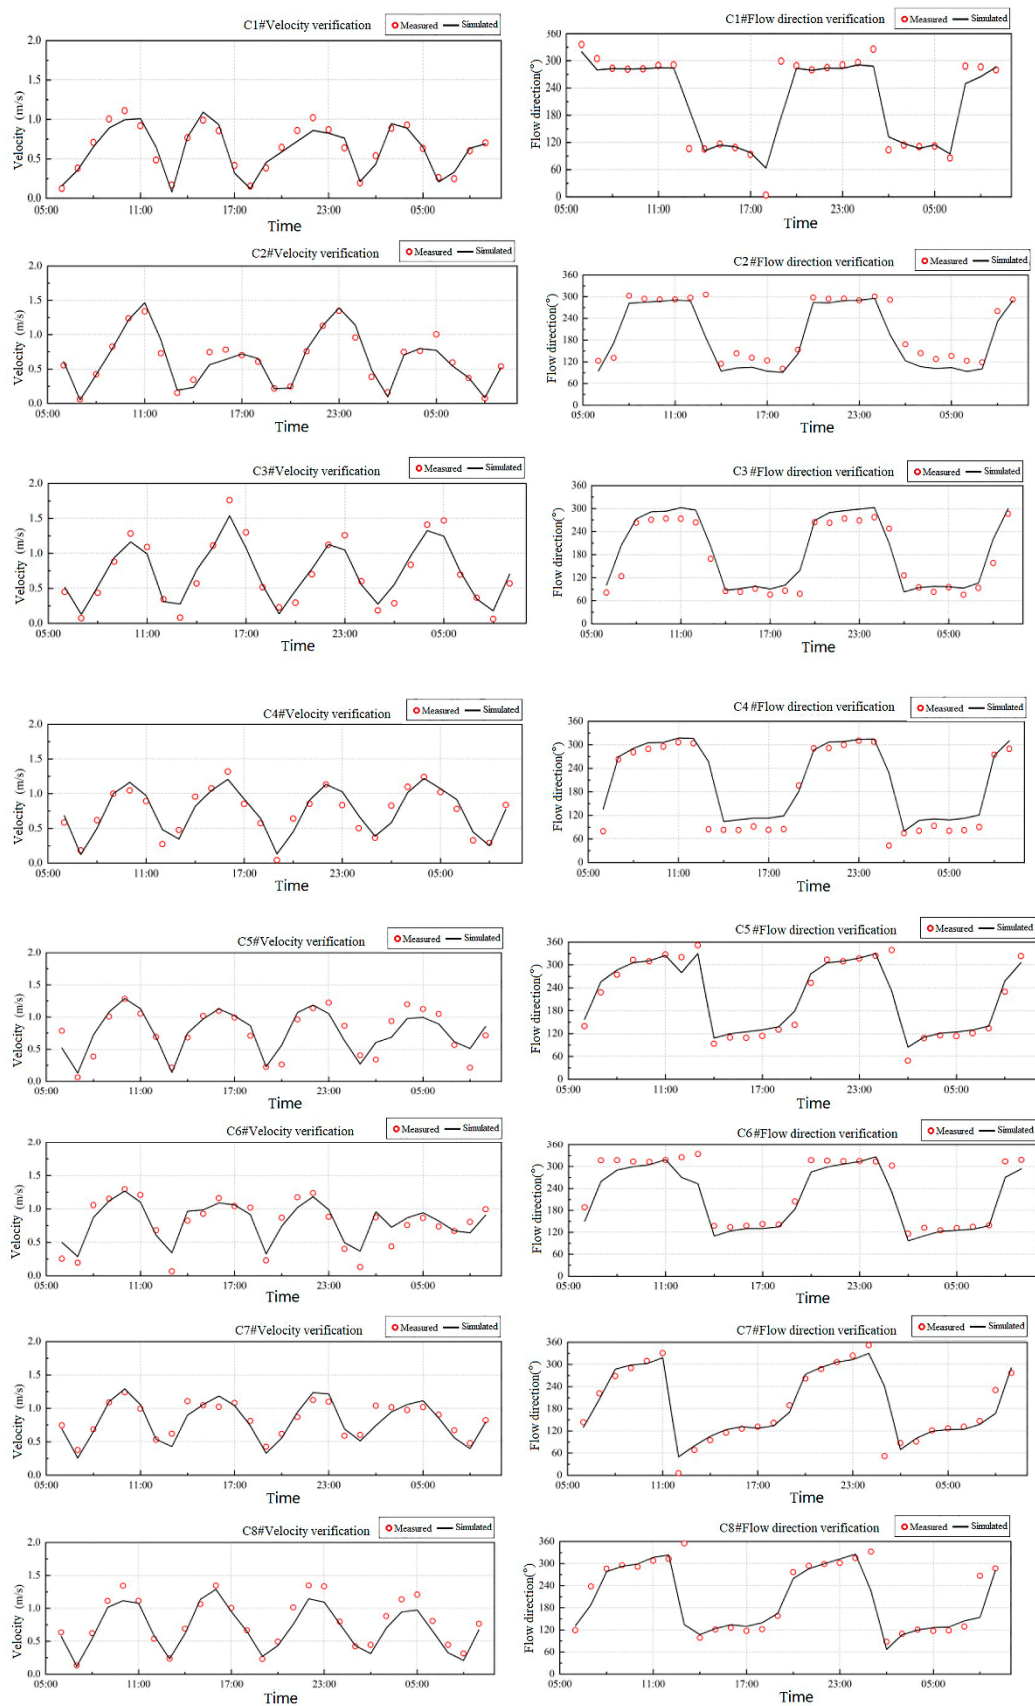

Figure S1. Validation of spring flow velocity and direction in April 2019.

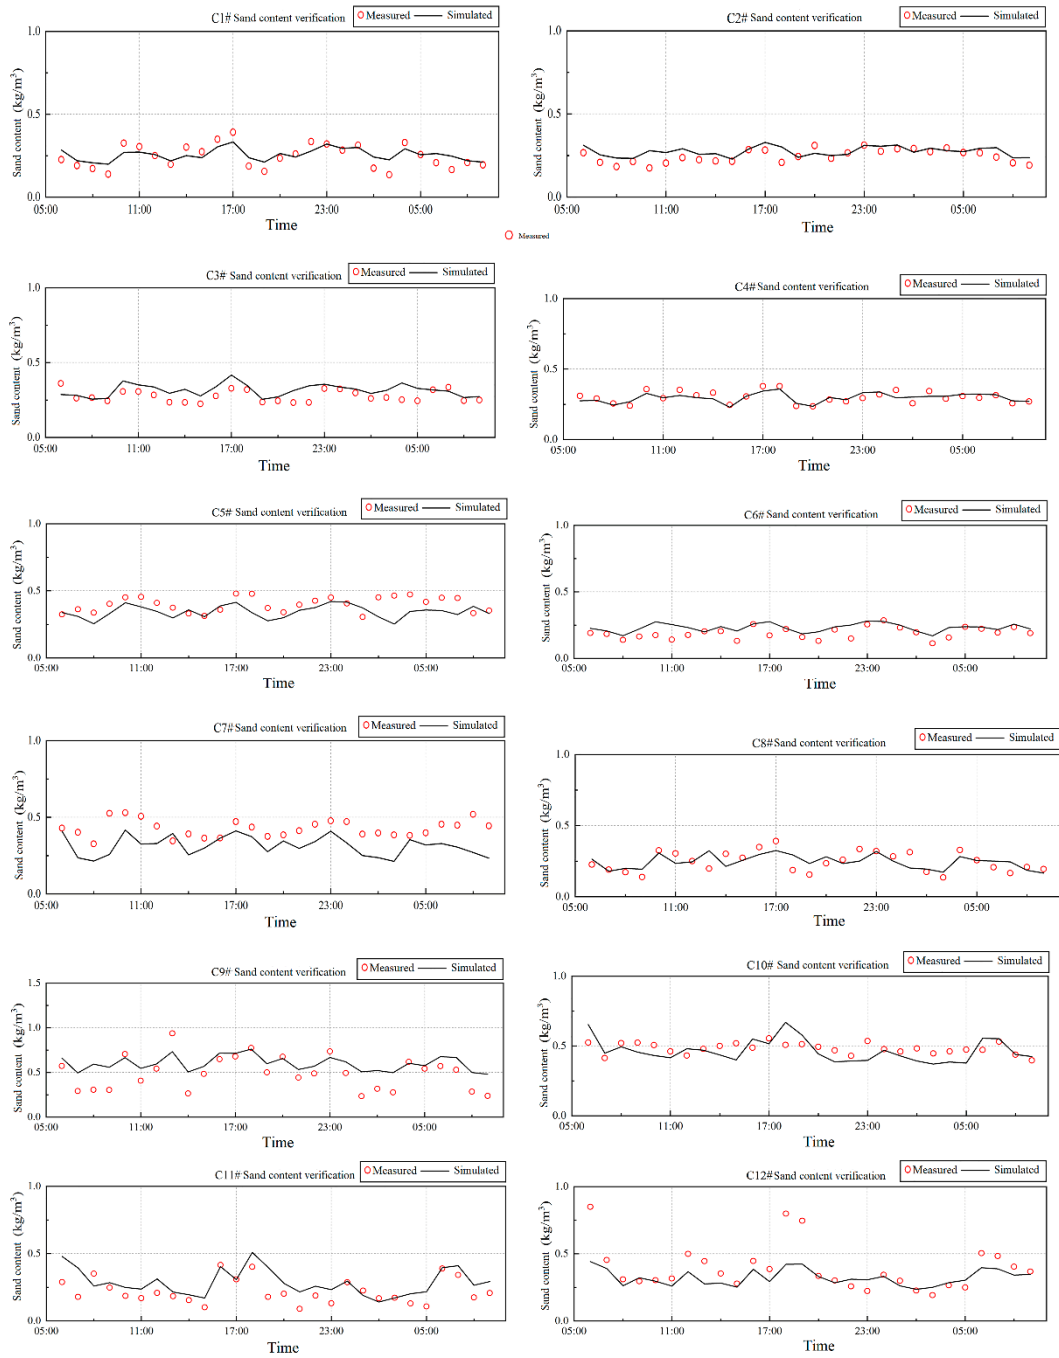

Figure S2. Validation of sediment concentration in water in April 2019

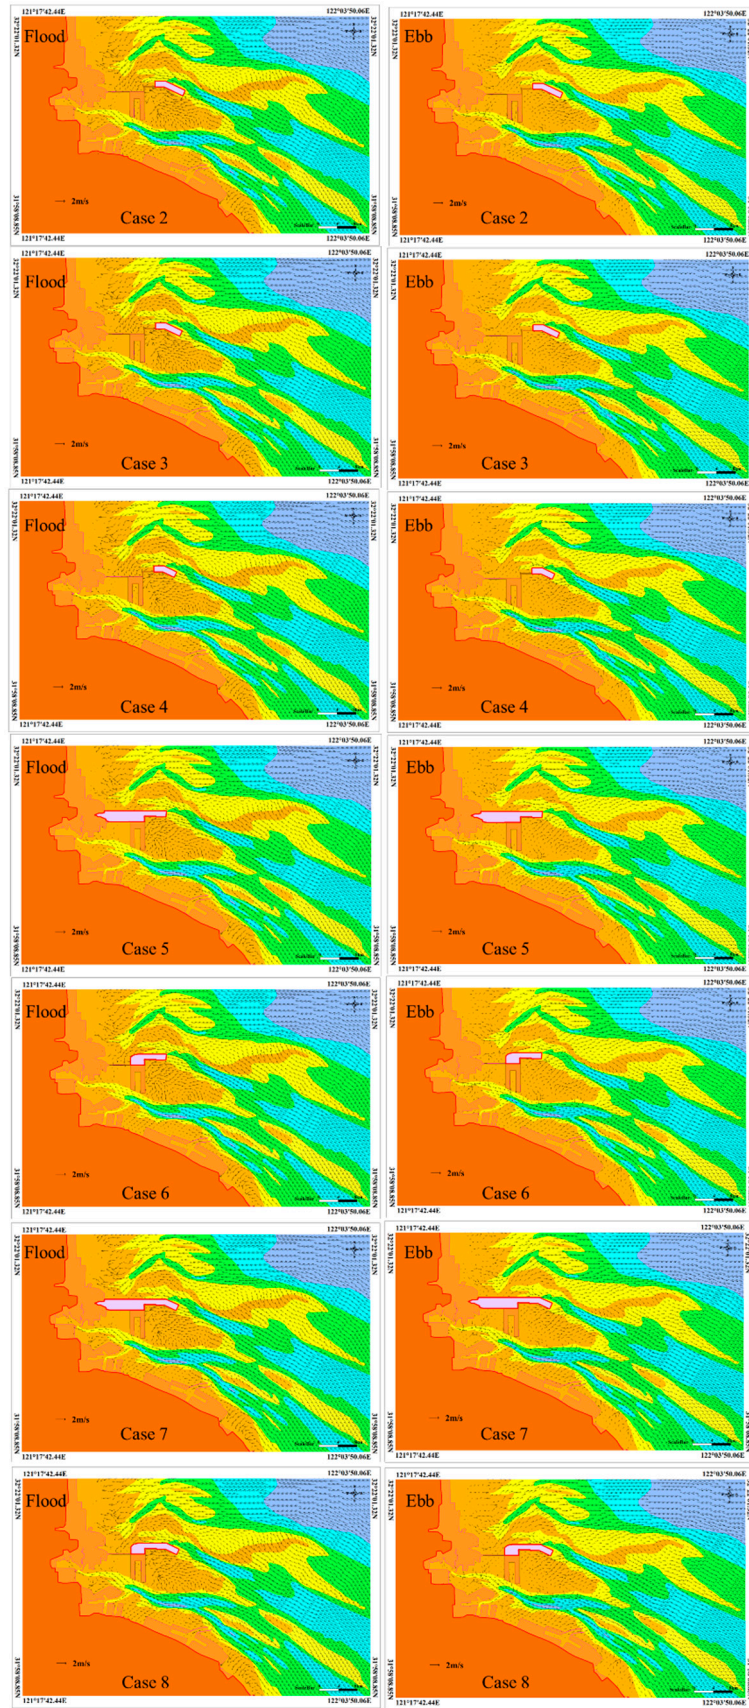

Figure S3. Influence of reclamation cases on the hydrodynamic environment

Table S1. Variation range of tidal flux at each section of the water channel

| Case   | time  | Variation range of tidal flux at channel section (%) |        |        |        |        |        |        |        |               |        |
|--------|-------|------------------------------------------------------|--------|--------|--------|--------|--------|--------|--------|---------------|--------|
|        |       | DM1                                                  | DM2    | DM3    | DM4    | DM5    | DM6    | DM7    | DM8    | DM9           | DM10   |
| Case 2 | flood | <b>-10.56%</b>                                       | -3.43% | -0.08% | -0.73% | -2.85% | -0.62% | -0.51% | -0.28% | 2.67%         | -1.49% |
|        | ebb   | <b>-11.58%</b>                                       | -1.48% | -3.74% | -4.21% | -1.14% | -2.30% | -0.43% | -1.02% | 3.20%         | -0.64% |
| Case 3 | flood | -7.03%                                               | -2.78% | -0.04% | -0.77% | -2.43% | -0.63% | -0.43% | -0.26% | 2.64%         | -1.33% |
|        | ebb   | -8.26%                                               | -1.31% | -3.62% | -3.85% | -1.03% | -1.89% | -0.34% | -0.91% | 2.93%         | -0.11% |
| Case 4 | flood | -4.69%                                               | -2.05% | 0.31%  | -0.64% | -1.95% | -0.51% | -0.32% | -0.23% | 2.61%         | -0.71% |
|        | ebb   | -6.13%                                               | -1.05% | -3.88% | -3.44% | -0.78% | -1.52% | -0.29% | -0.78% | 2.67%         | 0.39%  |
| Case 5 | flood | -4.90%                                               | -2.52% | 0.06%  | -0.68% | -1.16% | -0.48% | -0.23% | -0.16% | <b>-7.41%</b> | -0.94% |
|        | ebb   | -7.37%                                               | -1.58% | -3.39% | -2.59% | -0.60% | -1.04% | -0.31% | -0.80% | -3.55%        | 2.62%  |
| Case 6 | flood | -3.54%                                               | -2.05% | 0.09%  | -0.63% | -1.02% | -0.43% | -0.23% | -0.14% | -0.97%        | -0.79% |
|        | ebb   | -6.36%                                               | -1.25% | -3.15% | -2.41% | -0.54% | -1.01% | -0.23% | -0.57% | 2.56%         | 1.86%  |
| Case 7 | flood | -6.55%                                               | -3.09% | 0.23%  | -0.84% | -2.36% | -0.70% | -0.38% | -0.29% | -1.19%        | -1.15% |
|        | ebb   | <b>-11.20%</b>                                       | -1.78% | -5.12% | -3.80% | -1.01% | -1.56% | -0.26% | -0.93% | 2.42%         | 1.10%  |
| Case 8 | flood | -6.47%                                               | -3.06% | 0.24%  | -0.84% | -2.35% | -0.70% | -0.38% | -0.29% | -0.83%        | -1.15% |
|        | ebb   | -9.36%                                               | -1.75% | -1.49% | -1.27% | -1.00% | -1.56% | -0.27% | -0.93% | 2.54%         | 1.10%  |

Table S2. The variation of flood tide velocity in each case

| Feature points | Case 2        | Case 3        | Case 3        | Case 3 | Case 3 | Case 3        | Case 3        |
|----------------|---------------|---------------|---------------|--------|--------|---------------|---------------|
| 1              | <b>31.10%</b> | <b>34.92%</b> | <b>41.80%</b> | 2.32%  | 4.20%  | <b>37.52%</b> | <b>37.70%</b> |
| 2              | 1.40%         | -0.95%        | -1.59%        | -4.17% | -3.06% | -3.09%        | -3.03%        |
| 3              | -1.26%        | -1.35%        | -1.73%        | -3.14% | -2.49% | -2.70%        | -2.69%        |
| 4              | -0.38%        | -0.50%        | -0.97%        | -2.49% | -1.91% | -1.64%        | -1.64%        |
| 5              | -0.08%        | -0.12%        | -0.36%        | -1.05% | -0.75% | -0.63%        | -0.64%        |
| 6              | -0.04%        | -0.10%        | -0.37%        | -1.10% | -0.78% | -0.66%        | -0.66%        |
| 7              | 0.00%         | 0.01%         | -0.05%        | -0.48% | -0.26% | -0.25%        | -0.24%        |
| 8              | 0.03%         | 0.03%         | -0.06%        | -0.56% | -0.32% | -0.28%        | -0.27%        |
| 9              | 0.07%         | 0.05%         | -0.01%        | -0.30% | -0.19% | -0.16%        | -0.15%        |
| 10             | 0.04%         | 0.01%         | -0.05%        | -0.27% | -0.20% | -0.16%        | -0.16%        |
| 11             | -0.07%        | -0.09%        | -0.11%        | -0.19% | -0.16% | -0.17%        | -0.16%        |
| 12             | -1.39%        | -0.78%        | 0.09%         | 2.67%  | 1.85%  | 0.86%         | 0.81%         |
| 13             | 0.36%         | 0.31%         | 0.18%         | 0.45%  | 0.11%  | 0.33%         | 0.31%         |
| 14             | 1.03%         | 0.49%         | -0.36%        | -1.14% | -1.15% | -0.63%        | -0.63%        |
| 15             | 1.71%         | 0.56%         | -0.88%        | -2.62% | -2.23% | -1.48%        | -1.47%        |
| 16             | 1.65%         | 0.83%         | -0.67%        | -2.69% | -2.16% | -1.21%        | -1.20%        |
| 17             | 2.15%         | 1.08%         | -0.74%        | -3.25% | -2.58% | -1.41%        | -1.39%        |

|    |        |        |        |        |        |        |        |
|----|--------|--------|--------|--------|--------|--------|--------|
| 18 | 0.51%  | 0.35%  | -0.11% | -1.16% | -0.76% | -0.41% | -0.40% |
| 19 | 0.44%  | 0.32%  | -0.04% | -0.98% | -0.61% | -0.33% | -0.30% |
| 20 | 0.26%  | 0.24%  | 0.05%  | -0.70% | -0.38% | -0.23% | -0.21% |
| 21 | 0.18%  | 0.15%  | -0.02% | -0.67% | -0.38% | -0.28% | -0.26% |
| 22 | 0.26%  | 0.21%  | 0.02%  | -0.72% | -0.39% | -0.27% | -0.24% |
| 23 | -0.03% | -0.06% | -0.11% | -0.35% | -0.25% | -0.27% | -0.26% |
| 24 | -0.01% | -0.06% | -0.12% | -0.35% | -0.25% | -0.28% | -0.27% |
| 25 | 0.07%  | 0.00%  | -0.11% | -0.35% | -0.25% | -0.26% | -0.25% |
| 26 | -0.07% | -0.10% | -0.12% | -0.24% | -0.19% | -0.22% | -0.21% |
| 27 | -0.08% | -0.11% | -0.13% | -0.22% | -0.18% | -0.23% | -0.22% |
| 28 | -0.05% | -0.10% | -0.13% | -0.22% | -0.17% | -0.23% | -0.23% |

Table S3. Tidal flux variation of each section under stable topography with fixed bed and equilibrium in case 8 (%)

| Case 8      | DM1    |        | DM2    |        | DM3    |        | DM4    |        | DM5    |        |
|-------------|--------|--------|--------|--------|--------|--------|--------|--------|--------|--------|
|             | flood  | ebb    |
| Bed fixed   | -6.47% | -9.36% | -3.06% | -1.75% | 0.24%  | -1.49% | -0.84% | -1.27% | -2.35% | -1.00% |
| equilibrium | -4.66% | -3.37% | -1.48% | -0.58% | 1.69%  | -2.06% | -0.51% | -2.76% | -1.41% | -0.73% |
| Case 8      | DM6    |        | DM7    |        | DM8    |        | DM9    |        | DM10   |        |
|             | flood  | ebb    |
| Bed fixed   | -0.70% | -1.56% | -0.38% | -0.27% | -0.29% | -0.93% | -0.83% | 2.54%  | -1.15% | 1.10%  |
| equilibrium | -0.40% | -0.65% | -0.07% | -0.27% | -0.30% | -0.42% | -2.80% | -0.85% | -0.91% | -0.28% |

Table S4. Characteristic point changes of flow velocity

| Case 8      | 1          |                 | 2              |            | 3              |            | 4              |            | 5              |            | 6              |            |
|-------------|------------|-----------------|----------------|------------|----------------|------------|----------------|------------|----------------|------------|----------------|------------|
|             | flood      | ebb             | flood          | ebb        | flood          | ebb        | flood          | ebb        | flood          | ebb        | flood          | ebb        |
| Bed fixed   | 37.70<br>% | -<br>10.23<br>% | -<br>3.03<br>% | -<br>7.46% | -<br>2.69<br>% | -<br>6.45% | -<br>1.64<br>% | -<br>3.20% | -<br>0.64<br>% | -<br>2.01% | -<br>0.66<br>% | -<br>1.66% |
| equilibrium | 39.45<br>% | 4.70%           | 0.71<br>%      | -<br>8.02% | -<br>1.67<br>% | -<br>7.10% | -<br>1.71<br>% | -<br>6.46% | -<br>0.56<br>% | -<br>1.92% | -<br>0.62<br>% | -<br>1.49% |
| Case 8      | 7          |                 | 8              |            | 9              |            | 10             |            | 11             |            | 12             |            |
|             | flood      | ebb             | flood          | ebb        | flood          | ebb        | flood          | ebb        | flood          | ebb        | flood          | ebb        |
| Bed fixed   | -0.24%     | -1.28%          | -<br>0.27<br>% | -<br>1.23% | -<br>0.15<br>% | -<br>0.55% | -<br>0.16<br>% | -<br>0.32% | -<br>0.16<br>% | -<br>0.15% | 0.81<br>%      | -<br>3.14% |

|                 |        |        |                |            |                |            |                |            |                |            |                |            |
|-----------------|--------|--------|----------------|------------|----------------|------------|----------------|------------|----------------|------------|----------------|------------|
| equilibriu<br>m | -0.53% | -1.30% | -<br>0.60<br>% | -<br>1.24% | -<br>0.36<br>% | -<br>0.53% | -<br>0.34<br>% | -<br>0.23% | -<br>0.34<br>% | 0.00%      | 0.58<br>%      | -<br>1.59% |
| Case 8          | 13     |        | 14             |            | 15             |            | 16             |            | 17             |            | 18             |            |
|                 | flood  | ebb    | flood          | ebb        | flood          | ebb        | flood          | ebb        | flood          | ebb        | flood          | ebb        |
| Bed fixed       | 0.31%  | -2.94% | -<br>0.63<br>% | -<br>2.22% | -<br>1.47<br>% | -<br>1.56% | -<br>1.20<br>% | -<br>0.59% | -<br>1.39<br>% | -<br>1.08% | -<br>0.40<br>% | -<br>1.50% |
| equilibriu<br>m | 1.89%  | -2.38% | 0.07<br>%      | -<br>3.11% | 0.21<br>%      | -<br>0.09% | -<br>0.37<br>% | -<br>1.13% | -<br>0.65<br>% | 0.03%      | -<br>0.79<br>% | -<br>0.53% |
| Case 8          | 19     |        | 20             |            | 21             |            | 22             |            | 23             |            | 24             |            |
|                 | flood  | ebb    | flood          | ebb        | flood          | ebb        | flood          | ebb        | flood          | ebb        | flood          | ebb        |
| Bed fixed       | -0.30% | -1.05% | -<br>0.21<br>% | -<br>1.28% | -<br>0.26<br>% | -<br>1.06% | -<br>0.24<br>% | -<br>0.99% | -<br>0.26<br>% | -<br>0.23% | -<br>0.27<br>% | -<br>0.05% |
| equilibriu<br>m | -1.00% | -0.59% | -<br>0.79<br>% | -<br>1.10% | -<br>0.93<br>% | -<br>0.92% | -<br>1.09<br>% | -<br>0.86% | -<br>0.60<br>% | -<br>0.18% | -<br>0.69<br>% | 0.03%      |
| Case 8          | 25     |        | 26             |            | 27             |            | 28             |            |                |            |                |            |
|                 | flood  | ebb    | flood          | ebb        | flood          | ebb        | flood          | ebb        |                |            |                |            |
| Bed fixed       | -0.25% | 0.31%  | -<br>0.21<br>% | 0.03%      | -<br>0.22<br>% | 0.21%      | -<br>0.23<br>% | 0.42%      |                |            |                |            |
| equilibriu<br>m | -0.77% | 0.35%  | -<br>0.47<br>% | 0.17%      | -<br>0.50<br>% | 0.33%      | -<br>0.58<br>% | 0.54%      |                |            |                |            |
